# Supplementary material for: Extracellular Vesicle MicroRNA That Are Involved in β-Thalassemia Complications
Source: MDPI journal article supplement (doi:10.3390/ijms22189760), 2021-09-09
Supplement: s1 [file s1]

[illegible][illegible]

1

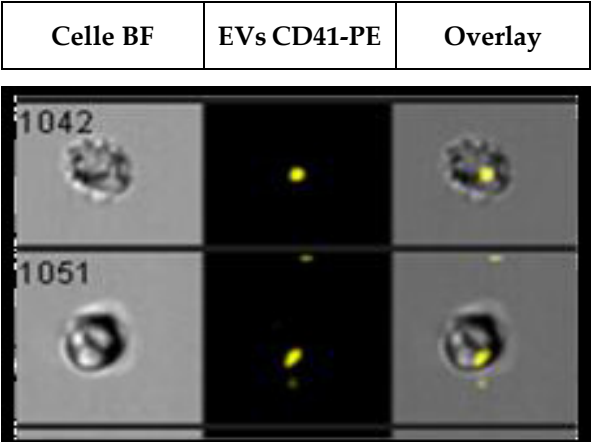

**Figure S3.** Extracellular vesicle cell interaction. Extracellular vesicles (EVs) labeled with anti-CD41-PE (yellow) and added to human umbilical vein endothelial cells. Images of cell uptake of the EVs were recorded in an Amnis flow cytometry device. BF, bright field (left column); fluorescence (middle and right columns).
